# Supplementary material for: Polymerisation of 2-acrylamido-2-methylpropane sulfonic acid sodium salt (NaAMPS) and acryloyl phosphatidylcholine (APC) via aqueous Cu(0)-mediated radical polymerisation
Source: Royal Society of Chemistry journal article supplement (doi:10.1039/c5py02016f), 2016-01-01
Supplement: c5py02016f1.pdf [file c5py02016f1.pdf]

## Supporting information

# Polymerisation of 2-acrylamido-2-methylpropane sulfonic acid sodium salt (NaAMPS) and acryloyl phosphatidylcholine (APC) via aqueous Cu(0)-mediated radical polymerisation

*Vasiliki Nikolaou,<sup>a</sup> Alexandre Simula,<sup>a</sup> Martijn Droesbeke,<sup>a</sup> Nuttapol Risangud,<sup>a</sup> Athina Anastasaki,<sup>a,b</sup> Kristian Kempe,<sup>a,b</sup> Paul Wilson,<sup>a,b</sup> and David M. Haddleton<sup>a,b\*</sup>*

*a - University of Warwick, Chemistry Department, Library road, CV4 7AL, Coventry, United Kingdom.*

*b - ARC Centre of Excellence in Convergent Bio-Nano Science and Technology, Monash Institute of Pharmaceutical Sciences, Monash University (Parkville Campus), 399 Royal Parade, Parkville, Victoria 3152, Australia*

### **Materials**

All chemicals were purchased from Sigma-Aldrich or Fischer Scientific unless otherwise stated. The water soluble initiator 2,3-dihydroxypropyl 2-bromo-2-methylpropanoate, and PEG-macroinitiator were prepared as reported in the literature.<sup>1, 2</sup> Tris(2-(dimethylamino)ethyl)amine (Me<sub>6</sub>TREN) was synthesized according to literature procedures and stored under nitrogen prior to use.<sup>3</sup> Copper (I) bromide (CuBr), was sequentially washed with acetic acid and ethanol and dried under vacuum.

### **Instruments and analysis**

<sup>1</sup>H NMR spectra were recorded on Bruker DPX-300 and DPX-400 spectrometers using deuterated solvents (D<sub>2</sub>O) obtained from Aldrich. Aqueous SEC traces were obtained on a PL-GPC50 system using a buffer (0.1M NaNO<sub>3</sub>, pH 7.4) eluent at 30°C, equipped with a

refractive index detector, two PLaquagel-OH 30 ( $300 \times 7.5$  mm), PLaquagel guard ( $50 \times 7.5$  mm) and autosampler. Narrow linear poly(ethylene oxide) and poly(methacrylic acid) standards in range of 200 to  $1.3 \times 10^5$  g.mol<sup>-1</sup> were used to calibrate the system. All samples were passed through 0.22µm PTFE filter before analysis.

### **General procedure for aqueous SET-LRP**

To a Schlenk tube fitted with a magnetic stirring bar and a rubber septum, H<sub>2</sub>O (2 mL) and Me<sub>6</sub>-Tren (0.4 equiv.) were added and the mixture was bubbled with nitrogen for 15 min. CuBr (0.4 equiv.) was then carefully added under slight positive pressure of nitrogen. The mixture immediately became blue ([Cu(Me<sub>6</sub>-Tren)]Br<sub>2</sub>) and a precipitation (Cu(0)) was observed. A separate vial fitted with a rubber septum and magnetic stirring bar was charged with initiator (1 equiv.), monomer (*DP* equiv.) and H<sub>2</sub>O (2 mL). The mixture was left to stir until complete dissolution of the monomer was obtained prior to deoxygenation by nitrogen sparging for 10 minutes. The solution was then cannulated into the Schlenk tube and the reaction was left to proceed at 0°C.

### **General procedure for chain extension/copolymerisation by aqueous SET-LRP**

General procedure for homopolymerisation following using the appropriate [M] : [I] : [CuBr] : [Me<sub>6</sub>-Tren] ratio. Homopolymerisations allowed to reach near quantitative conversion prior to addition of a degassed aliquot of the chosen monomer (*DP*, equiv.), in H<sub>2</sub>O (50 wt%) *via* a nitrogen-purged syringe. The resulting solution was stirred at 0°C and progress was followed intermittent sampling with analysis by <sup>1</sup>H NMR and SEC .

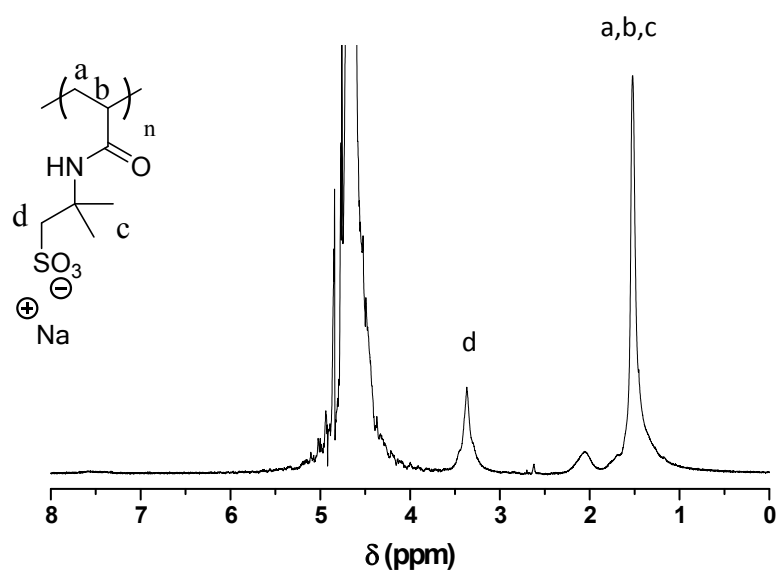

**Figure S1:**  $^1\text{H}$  NMR ( $\text{D}_2\text{O}$ ) spectrum of  $\text{PNaAMPS}_{20}$  utilising aqueous SET-LRP. Initial conditions:  $[\text{NaAMPS}]:[\text{I}]:[\text{CuBr}]:[\text{Me}_6\text{-Tren}] = [20]:[1]:[0.4]:[0.4]$  in 4 mL  $\text{H}_2\text{O}$  at  $0^\circ\text{C}$ .

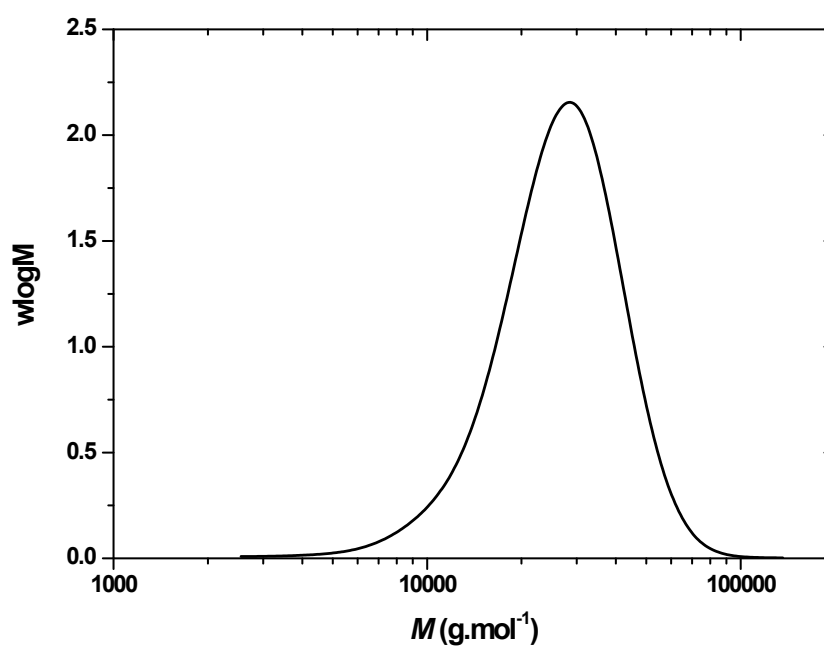

**Figure S2:** Aqueous SEC analysis for the synthesis of  $\text{PNaAMPS}_{40}$  utilising aqueous SET-LRP. Initial conditions:  $[\text{NaAMPS}]:[\text{I}]:[\text{CuBr}]:[\text{Me}_6\text{-Tren}] = [40]:[1]:[0.4]:[0.4]$  in 4 mL  $\text{H}_2\text{O}$  at  $0^\circ\text{C}$ .

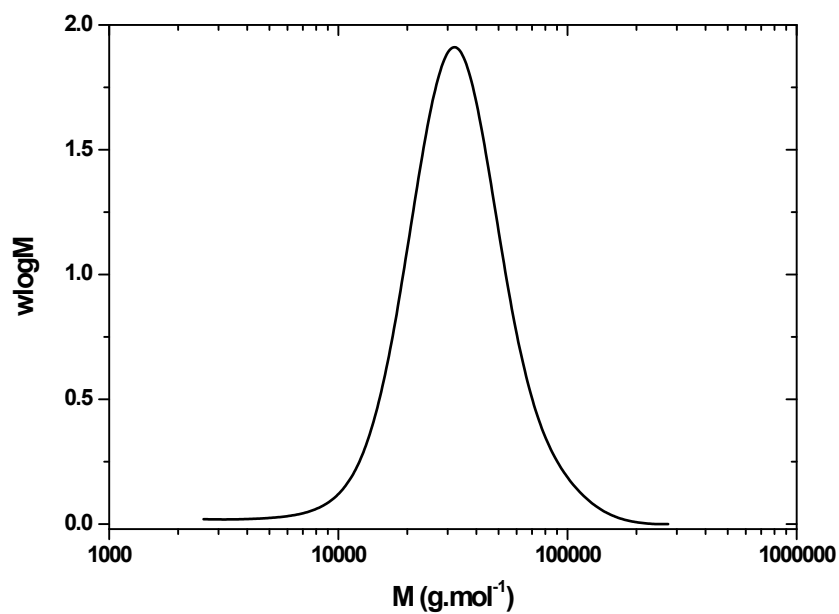

**Figure S3:** Aqueous SEC analysis for the synthesis of PNaAMPS<sub>80</sub> utilising aqueous SET-LRP. Initial conditions: [NaAMPS]:[I]:[CuBr]:[Me<sub>6</sub>-Tren] = [80]:[1]:[0.8]:[0.4] in 4 mL H<sub>2</sub>O at 0°C.

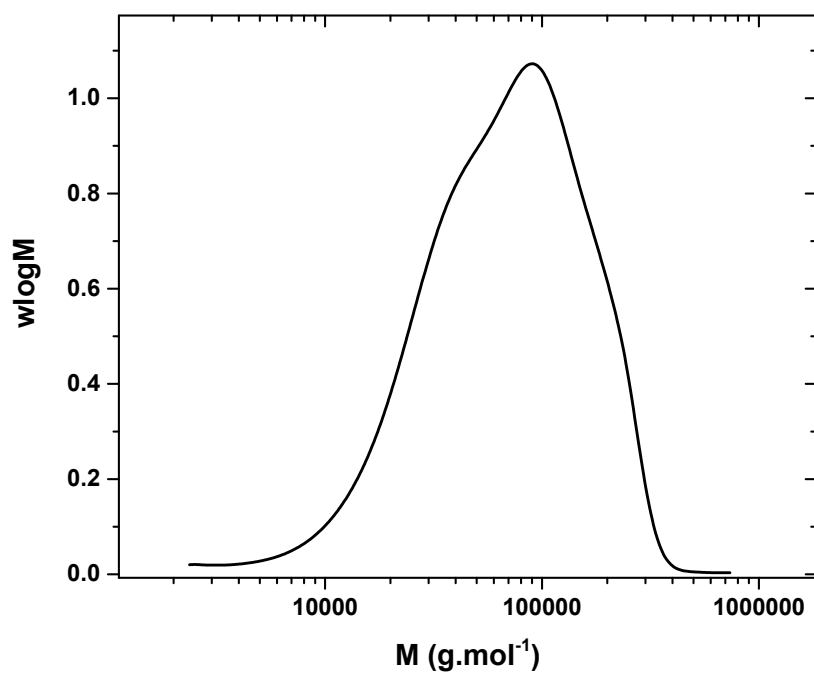

**Figure S4:** Aqueous SEC analysis for the synthesis of PNaAMPS<sub>160</sub> utilising aqueous SET-LRP. Initial conditions: [NaAMPS]:[I]:[CuBr]:[Me<sub>6</sub>-Tren] = [160]:[1]:[0.8]:[0.4] in 4 mL H<sub>2</sub>O at 0°C.

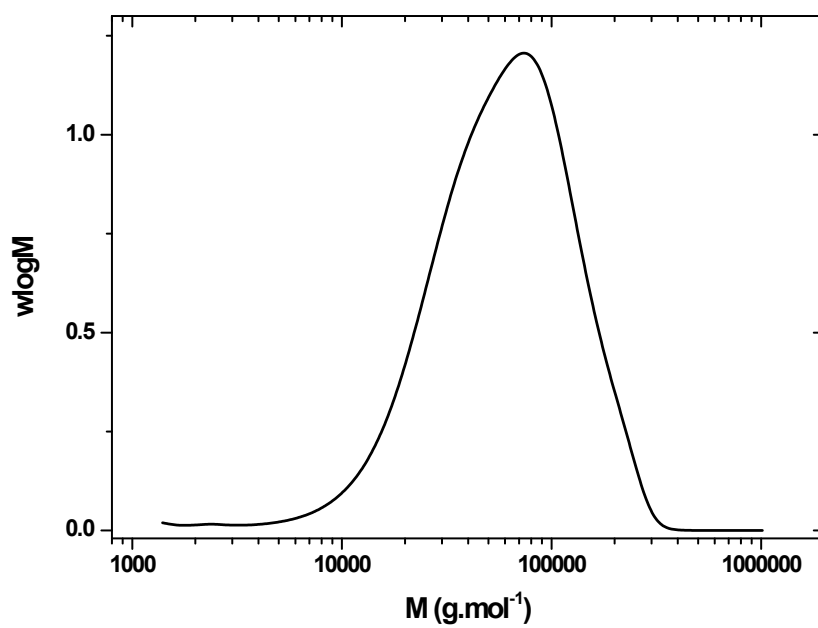

**Figure S5:** Aqueous SEC analysis for the synthesis of PNaAMPS<sub>160</sub> utilising aqueous SET-LRP. Initial conditions: [NaAMPS]:[I]:[CuBr]:[Me<sub>6</sub>-Tren] = [160]:[1]:[1.6]:[1] in 4 mL H<sub>2</sub>O at 0°C.

**Table S1.** Polymerisation of KSPA by aqueous SET-LRP

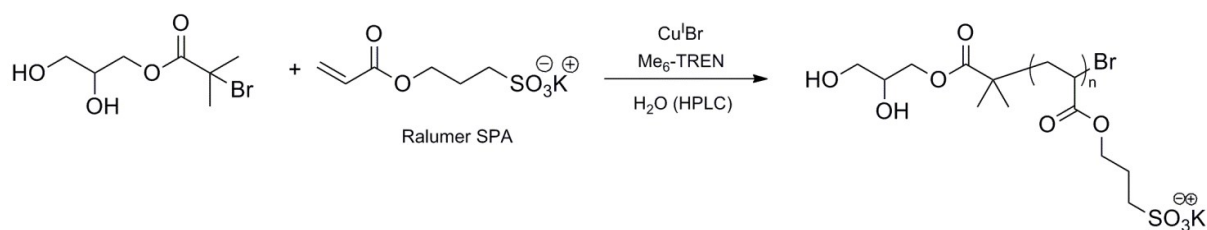

| $\text{DP}_{n,\text{th}}$ | T (°C) | Ratio (Cu-L) | Time  | Conversion | $^*\text{D}$ | $^*M_{n,\text{th}}$ (g.mol <sup>-1</sup> ) | $^{**}M_{n,\text{NMR}}$ (g.mol <sup>-1</sup> ) | $^*M_{n,\text{SEC}}$ (g.mol <sup>-1</sup> ) |
|---------------------------|--------|--------------|-------|------------|--------------|--------------------------------------------|------------------------------------------------|---------------------------------------------|
| 20                        | 25     | 0.4-0.4      | 30min | Full       | 1.22         | 4900                                       | 5100                                           | 6600                                        |
| 40                        | 25     | 0.4-0.4      | 30min | Full       | 1.18         | 9500                                       | 10500                                          | 9700                                        |
| 80                        | 0      | 0.6-0.4      | 30min | Full       | 1.31         | 18800                                      | 16700                                          | 14700                                       |
| 160                       | 0      | 0.6-0.4      | 1h    | 97%        | 1.47         | 37400                                      | 27900                                          | 22700                                       |
| 320                       | 0      | 0.6-0.6      | 3h    | 97%        | 1.84         | 74600                                      | 75000                                          | 39700                                       |

\* Determined by aqueous SEC

\*\* Determined by  $^1\text{H}$  NMR in  $\text{D}_2\text{O}$

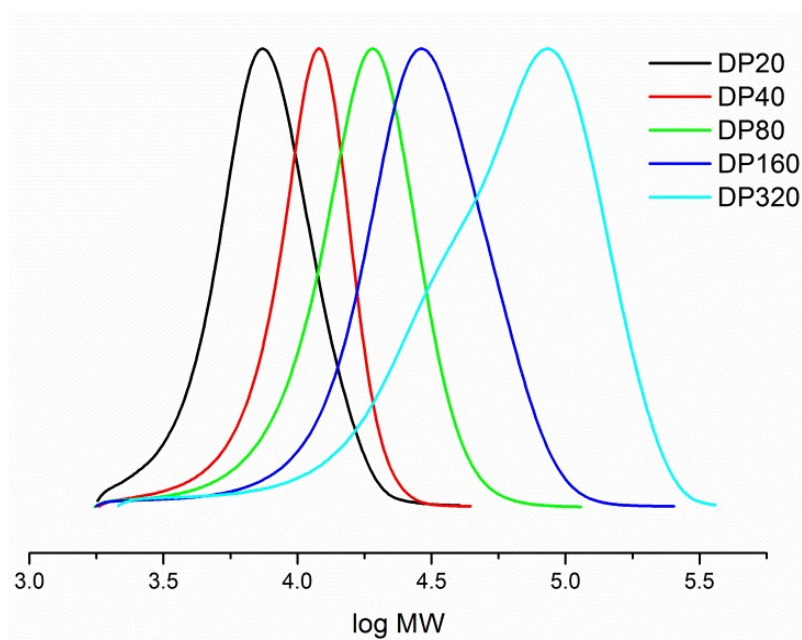

**Figure S6:** Aqueous SEC analysis for the synthesis of PKSPA utilising aqueous SET-LRP.

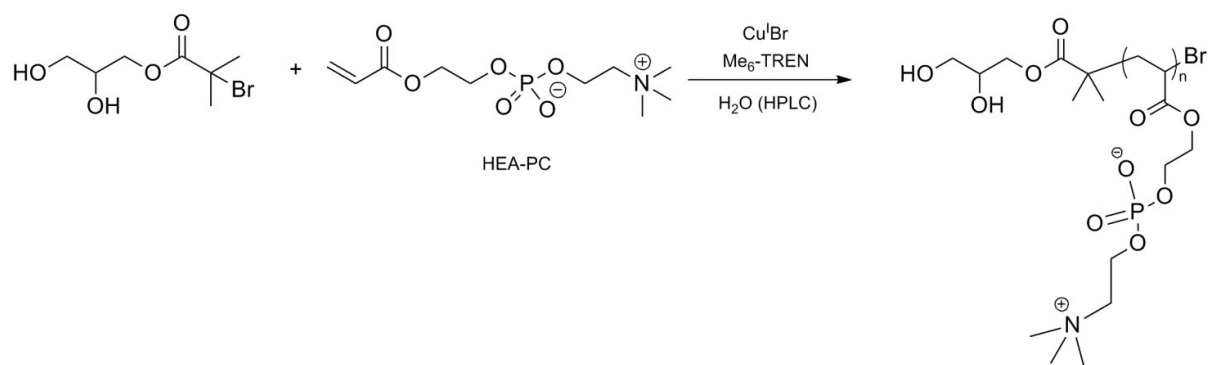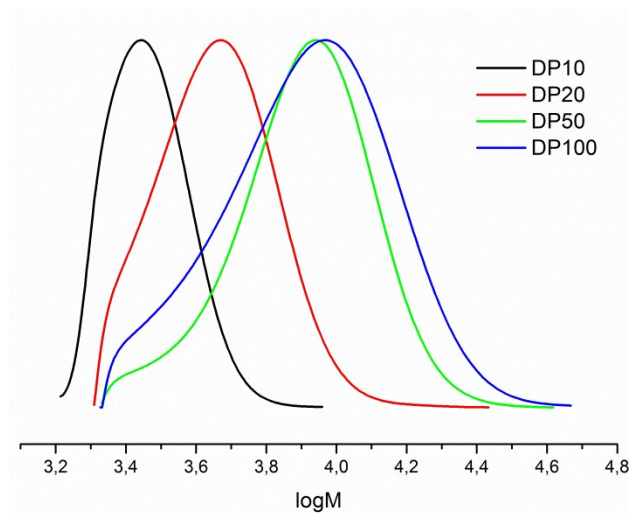

**Figure S7:** Aqueous SEC analysis for the synthesis of PAPC utilising aqueous SET-LRP.

**Table S2.** Synthesis of NaAMPS containing block copolymers by aqueous SET-LRP.

|                                                 | Cycle | Time (min) | Conversion (%) | $^*M_n$ (g.mol <sup>-1</sup> ) | $^*D$ |
|-------------------------------------------------|-------|------------|----------------|--------------------------------|-------|
| <b><i>In situ</i></b><br><b>Chain Extension</b> | AMPS  | 30         | > 99           | 11600                          | 1.21  |
|                                                 | AMPS  | 30         | > 99           | 18000                          | 1.21  |
| <b>Block</b><br><b>(co)polymerisations</b>      | PEGA  | 30         | 100            | 5800                           | 1.24  |
|                                                 | AMPS  | 30         | 100            | 14100                          | 1.30  |
|                                                 | HEAm  | 30         | 100            | 2500                           | 1.29  |
|                                                 | AMPS  | 30         | 100            | 14000                          | 1.15  |
|                                                 | AMPS  | 30         | 100            | 11000                          | 1.17  |
|                                                 | NIPAm | 30         | 100            | -                              | -     |

\* Determined by aqueous SEC

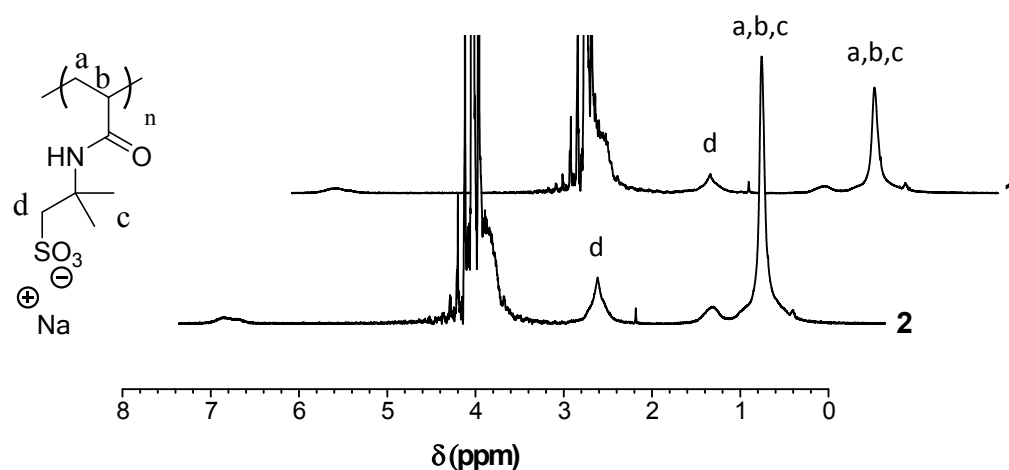

**Figure S8:** <sup>1</sup>H NMR analysis for the *in situ* chain extension from a PNaAMPS<sub>20</sub> macroinitiator utilising aqueous SET-LRP. Initial conditions: [NaAMPS]:[I]:[CuBr]:[Me<sub>6</sub>-Tren] = [20]:[1]:[0.4]:[0.4]. Chain extension achieved upon addition of an aliquot of NaAMPS (20 equiv.) in H<sub>2</sub>O (2 mL).



**Table S3.** Synthesis and chain extension of PAPC pseudo block copolymers by aqueous SET-LRP.

| $DP_{n,th}$ | T (°C) | Ratio (Cu-L) | Time  | Conv. | $^*D$ | $M_{n,th}$ (g.mol <sup>-1</sup> ) | $^{**}M_{n,NMR}$ (g.mol <sup>-1</sup> ) | $^*M_{nSEC}$ (g.mol <sup>-1</sup> ) |
|-------------|--------|--------------|-------|-------|-------|-----------------------------------|-----------------------------------------|-------------------------------------|
| 10          | 0      | 0.6-0.8      | 30min | 92 %  | 1.16  | 3100                              | 3100                                    | 2600                                |
| 10+10       | 0      | 0.6-0.8      | 1h30  | Full  | 1.14  | 5900                              | 5900                                    | 4400                                |
| 10+10+10    | 0      | 0.6-0.8      | 3h30  | Full  | 1.23  | 8700                              | 10400                                   | 5400                                |
| 10+10+10+10 | 0      | 0.6-0.8      | 22h30 | 76 %  | 1.15  | 11500                             | 14000                                   | 5800                                |

\* Determined by aqueous SEC

\*\* Determined by <sup>1</sup>H NMR in D<sub>2</sub>O

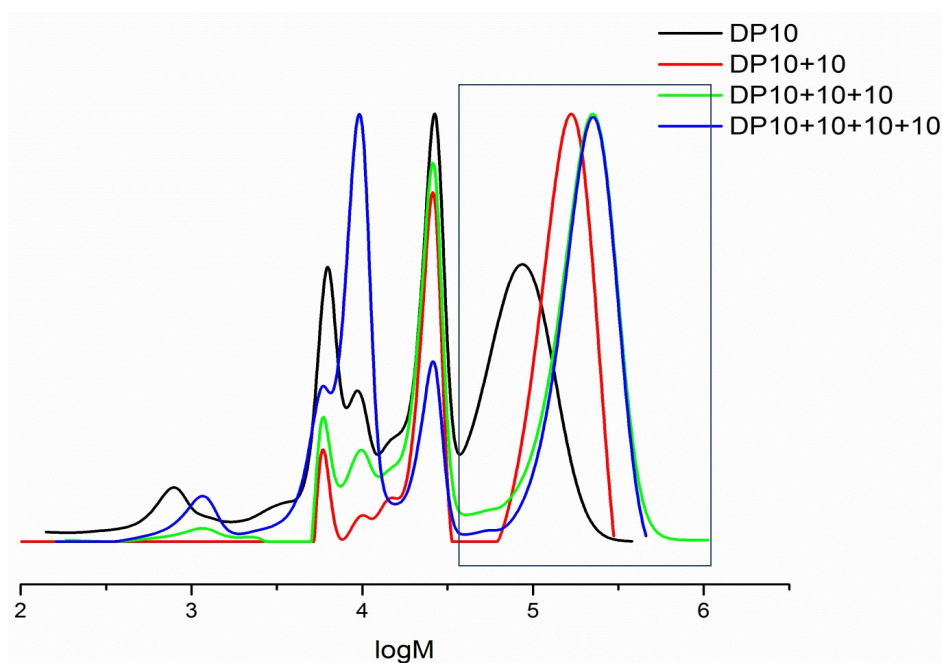

**Figure S9:** Aqueous SEC analysis for the synthesis and chain extension of PAPC pseudo block copolymer utilising aqueous SET-LRP. Numbers reported come from analysis of the peaks in the box. The low molecular weights peaks did not coincide with the monomer and have been assigned as unidentified impurities/system peaks.

**Table S4.** Synthesis PEG-*b*-NaAMPS copolymers by aqueous SET-LRP.

| DP  | Cu:L    | * $M_{n,NMR}$<br>(g/mol) | ** $M_{n,SEC}$<br>(g/mol) | $M_{n,th}$<br>(g/mol) | ** $\mathcal{D}$ | Conversion (%) |
|-----|---------|--------------------------|---------------------------|-----------------------|------------------|----------------|
| 25  | 0.8:0.4 | 8000                     | 8700                      | 7800                  | 1.21             | >99            |
| 50  | 0.8:0.4 | 13500                    | 17000                     | 13600                 | 1.34             | >99            |
| 100 | 0.8:0.4 | 33000                    | 23400                     | 25000                 | 1.88             | >99            |

\* Determined by  $^1\text{H}$  NMR in  $\text{D}_2\text{O}$

\*\* Determined by aqueous SEC

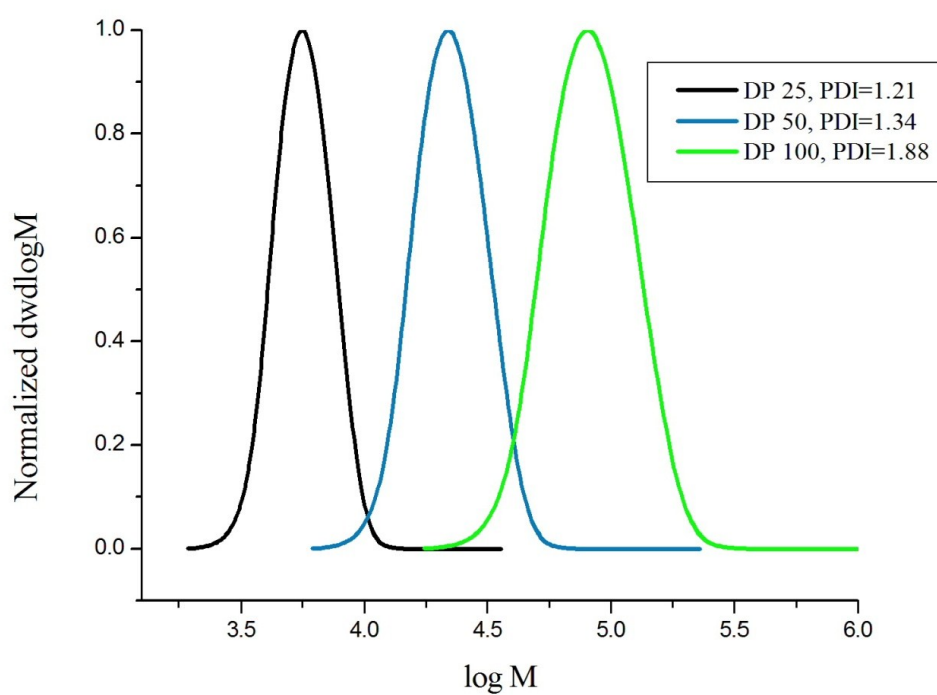

**Figure S10:** Aqueous SEC analysis for the synthesis of PEG-*b*-NaAMPS copolymer by aqueous SET-LRP.

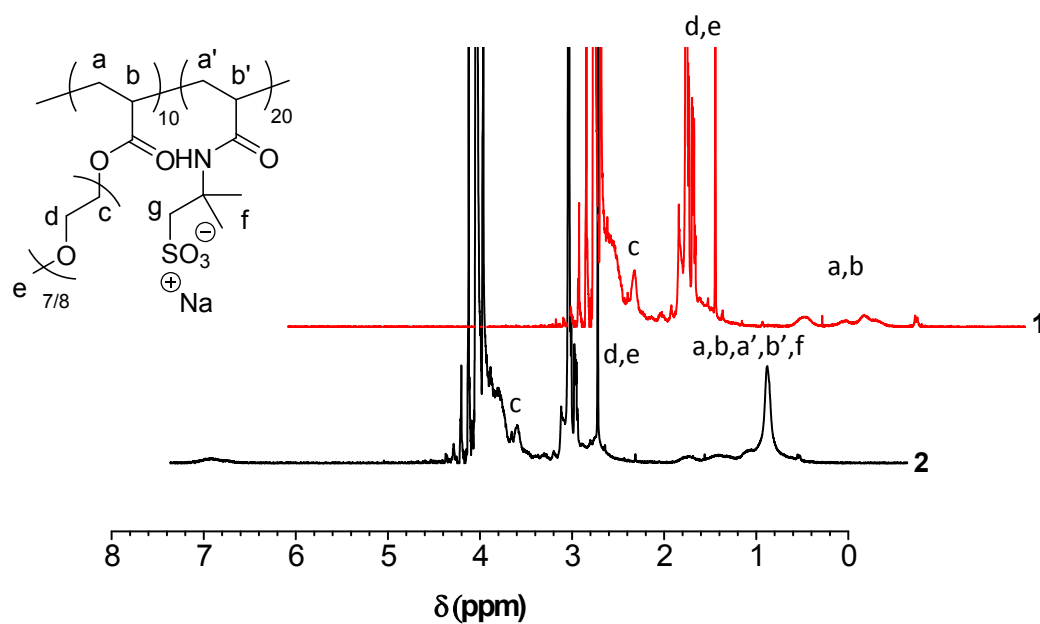

**Figure S11:**  $^1\text{H}$  NMR analysis for the *in situ* chain extension from a PPEGA<sub>10</sub> macroinitiator utilising aqueous SET-LRP. Initial conditions: [PEGA]:[I]:[CuBr]:[Me<sub>6</sub>-Tren] = [10]:[1]:[0.4]:[0.4]. Chain extension achieved upon addition of an aliquot of NaAMPS (20 equiv.) in H<sub>2</sub>O (2 mL).

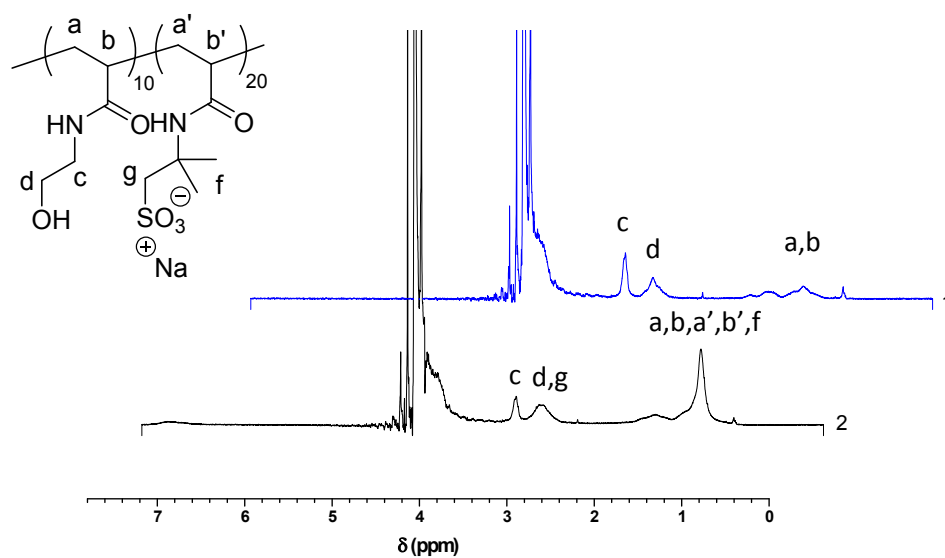

**Figure S12:**  $^1\text{H}$  NMR analysis for the *in situ* chain extension from a PHEAm<sub>20</sub> macroinitiator utilising aqueous SET-LRP. Initial conditions: [HEAm]:[I]:[CuBr]:[Me<sub>6</sub>-Tren] = [20]:[1]:[0.4]:[0.4]. Chain extension achieved upon addition of an aliquot of NaAMPS (20 equiv.) in H<sub>2</sub>O (2 mL).

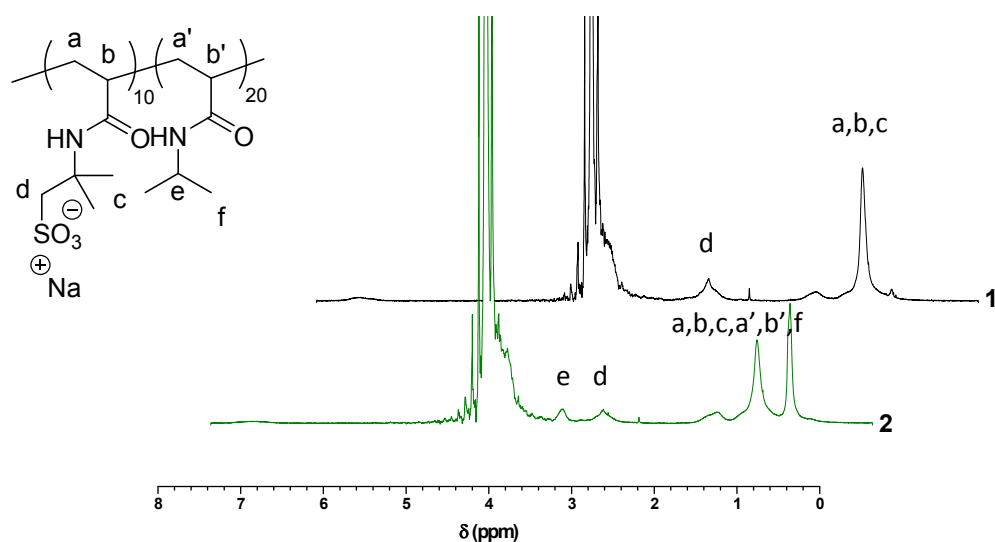

**Figure S13:**  $^1\text{H}$  NMR analysis for the *in situ* block copolymerisation from a  $\text{PNaAMPS}_{20}$  macroinitiator utilising aqueous SET-LRP. Initial conditions:  $[\text{NaAMPS}]:[\text{I}]:[\text{CuBr}]:[\text{Me}_6\text{-Tren}] = [20]:[1]:[0.4]:[0.4]$ . Chain extension achieved upon addition of an aliquot of NIPAm (20 equiv.) in  $\text{H}_2\text{O}$  (2 mL).

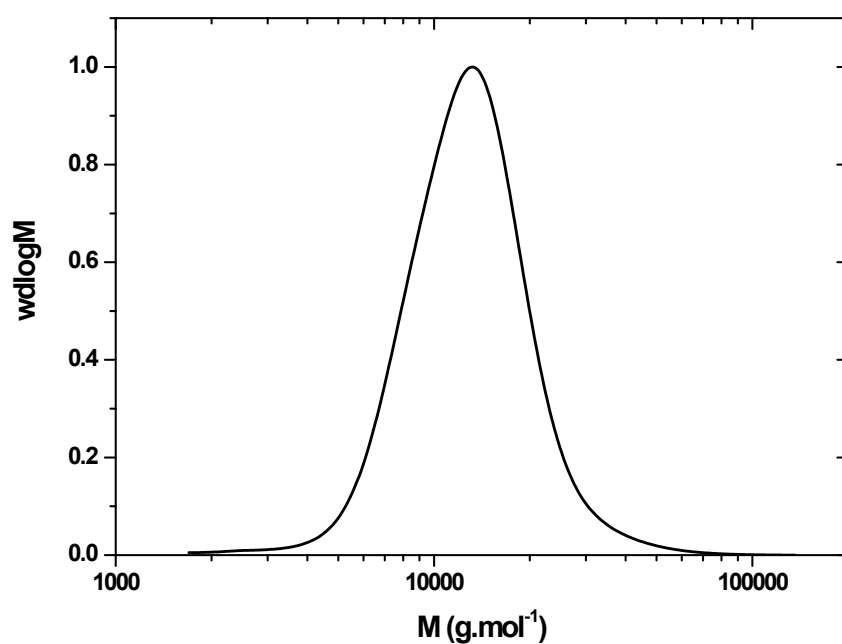

**Figure S14:** SEC analysis for the  $\text{PNaAMPS}_{20}$  macroinitiator utilising aqueous SET-LRP. Initial conditions:  $[\text{NaAMPS}]:[\text{I}]:[\text{CuBr}]:[\text{Me}_6\text{-Tren}] = [20]:[1]:[0.4]:[0.4]$ .

**Table S5.** Synthesis of P(APC)<sub>10</sub>-*b*-(NIPAm)<sub>80</sub> by aqueous SET-LRP.

| DP <sub>n,th</sub> | T (°C) | Ratio (Cu-L) | Time | Conv. | *D | M <sub>n,th</sub><br>(g.mol <sup>-1</sup> ) | **M <sub>n,NMR</sub><br>(g.mol <sup>-1</sup> ) | *M <sub>nSEC</sub><br>(g.mol <sup>-1</sup> ) |
|--------------------|--------|--------------|------|-------|----|---------------------------------------------|------------------------------------------------|----------------------------------------------|
| 10                 | 0      | 0.8-0.6      | 1h   | 97 %  | *  | 3100                                        | 3100(10)                                       | *                                            |
| 10+80              | 0      | 0.8-0.6      | 5h   | 96 %  | *  | 12100                                       | -                                              | *                                            |

\* Determined by aqueous SEC

\*\* Determined by <sup>1</sup>H NMR in D<sub>2</sub>O

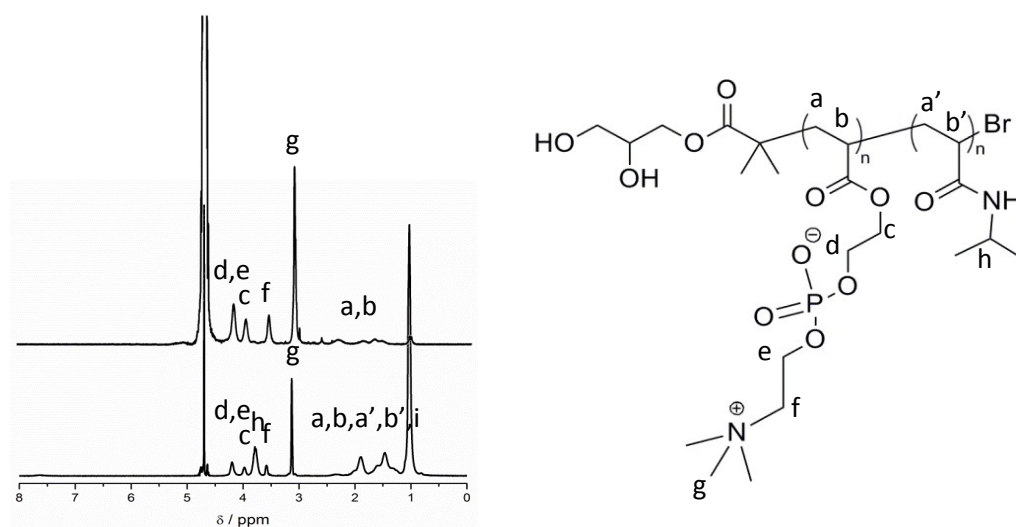

**Figure S15:** <sup>1</sup>H NMR analysis for the *in situ* block copolymerisation from a PAPC macroinitiator utilising aqueous SET-LRP. Initial conditions: [APC]:[I]:[CuBr]:[Me<sub>6</sub>-Tren] = [10]:[1]:[0.4]:[0.4]. Copolymerisation achieved upon addition of an aliquot of NIPAm (80 equiv.) in H<sub>2</sub>O (2 mL).

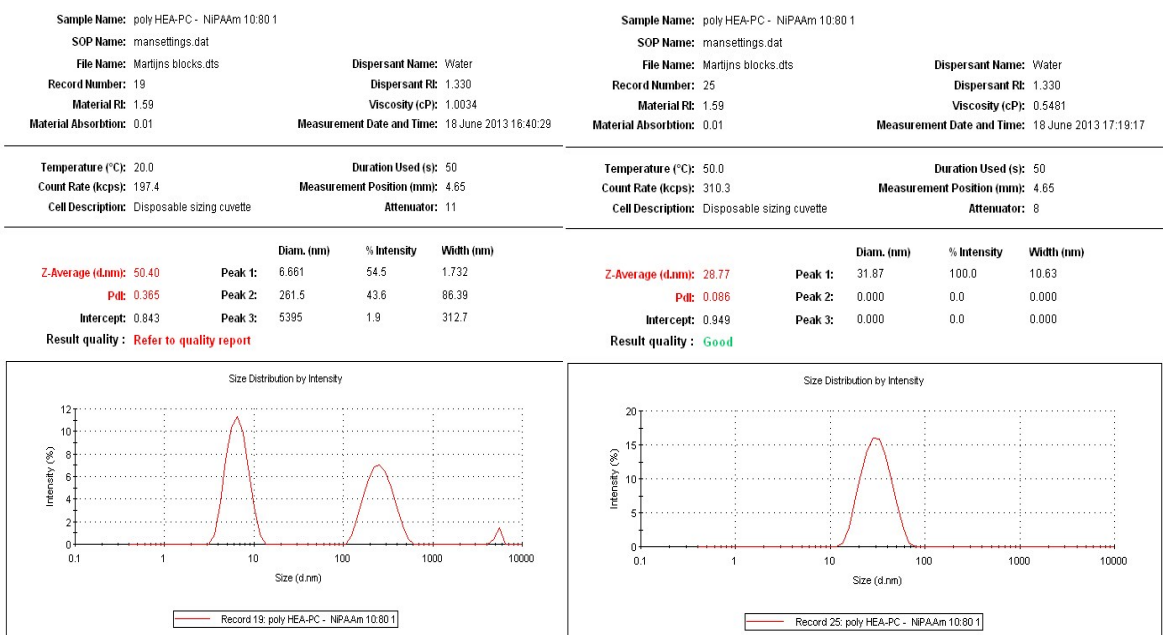

**Figure S16:** DLS data for P(APC)<sub>10</sub>-*b*-(NIPAm)<sub>80</sub> in pure water at 20 °C (left) and above the LCST at 50 °C (right) showing temperature dependent transition to well defined nanoparticles.

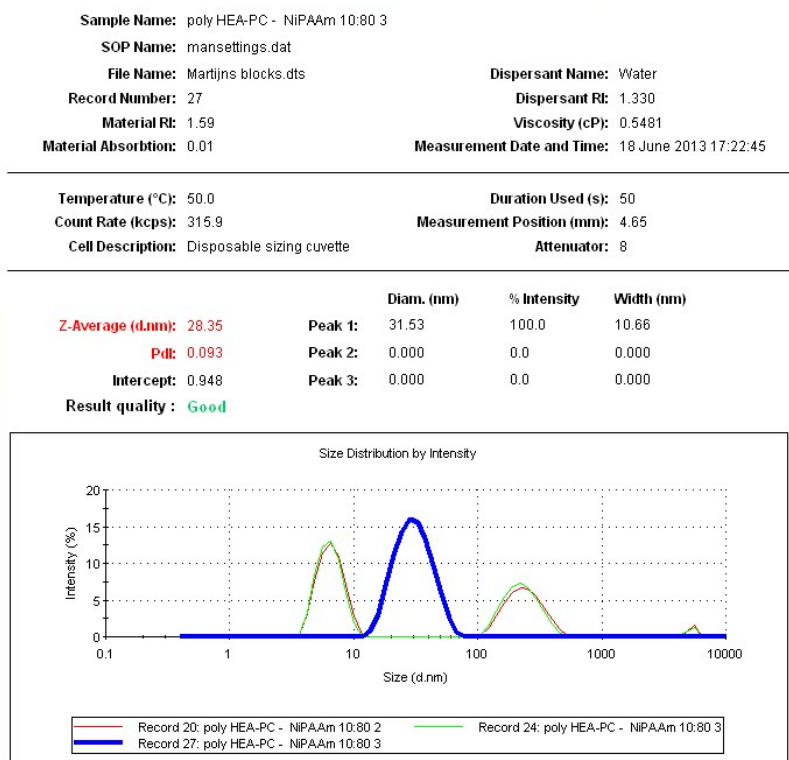

**Figure S17:** DLS data for heating-cooling cycles of the P(APC)<sub>10</sub>-*b*-(NIPAm)<sub>80</sub> in pure water.

## References

1. S. Perrier, S. P. Armes, X. S. Wang, F. Malet and D. M. Haddleton, *Journal of Polymer Science Part A: Polymer Chemistry*, 2001, **39**, 1696-1707.
2. S. Perrier and D. M. Haddleton, *European Polymer Journal*, 2004, **40**, 2277-2286.
3. M. Ciampolini and N. Nardi, *Inorganic Chemistry*, 1966, **5**, 41-44.
